# Supplementary material for: Loss of West Nile virus genetic diversity during mosquito infection due to species-dependent population bottlenecks
Source: PubMed Central journal article supplement — iScience. 2023 Aug 25;26(10):107711. doi: 10.1016/j.isci.2023.107711 (PMC10494182; doi:10.1016/j.isci.2023.107711), 2023-08-25
Supplement: mmc1.pdf [file mmc1.pdf]

**Supplemental information**

**Loss of West Nile virus genetic diversity  
during mosquito infection due to  
species-dependent population bottlenecks**

**Emily A. Fitzmeyer, Emily N. Gallichotte, James Weger-Lucarelli, Marylee L. Kapuscinski, Zaid Abdo, Kyra Pyron, Michael C. Young, and Gregory D. Ebel**

**A**

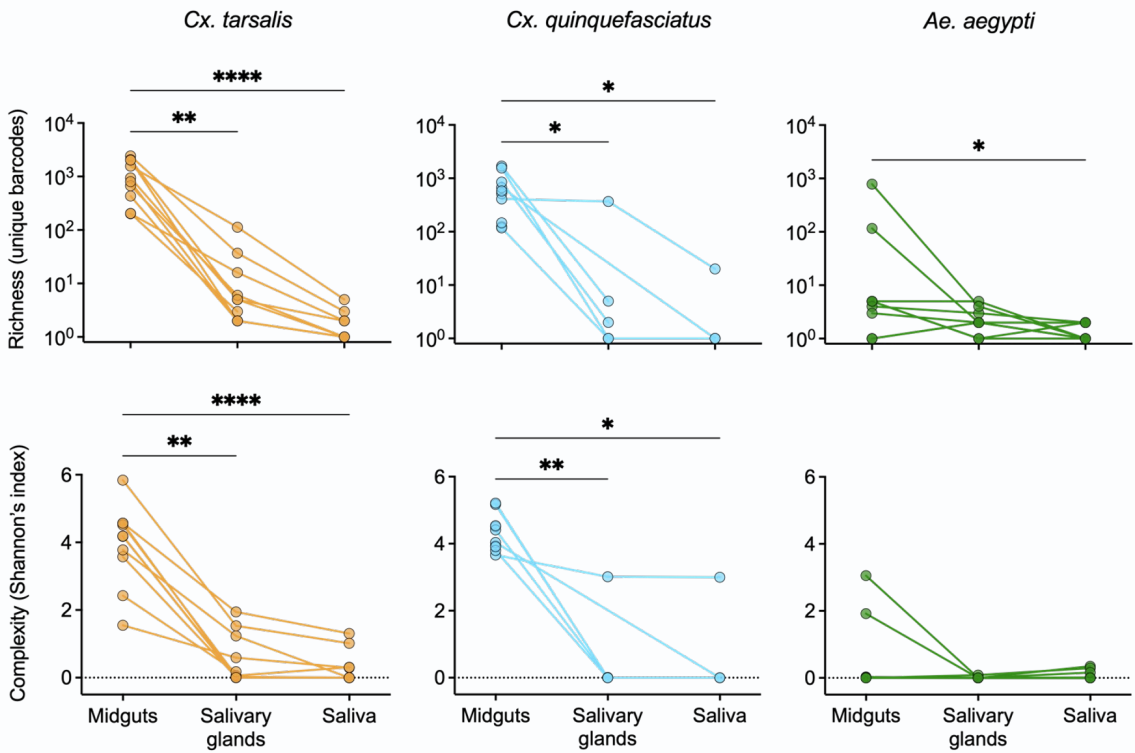

**B**

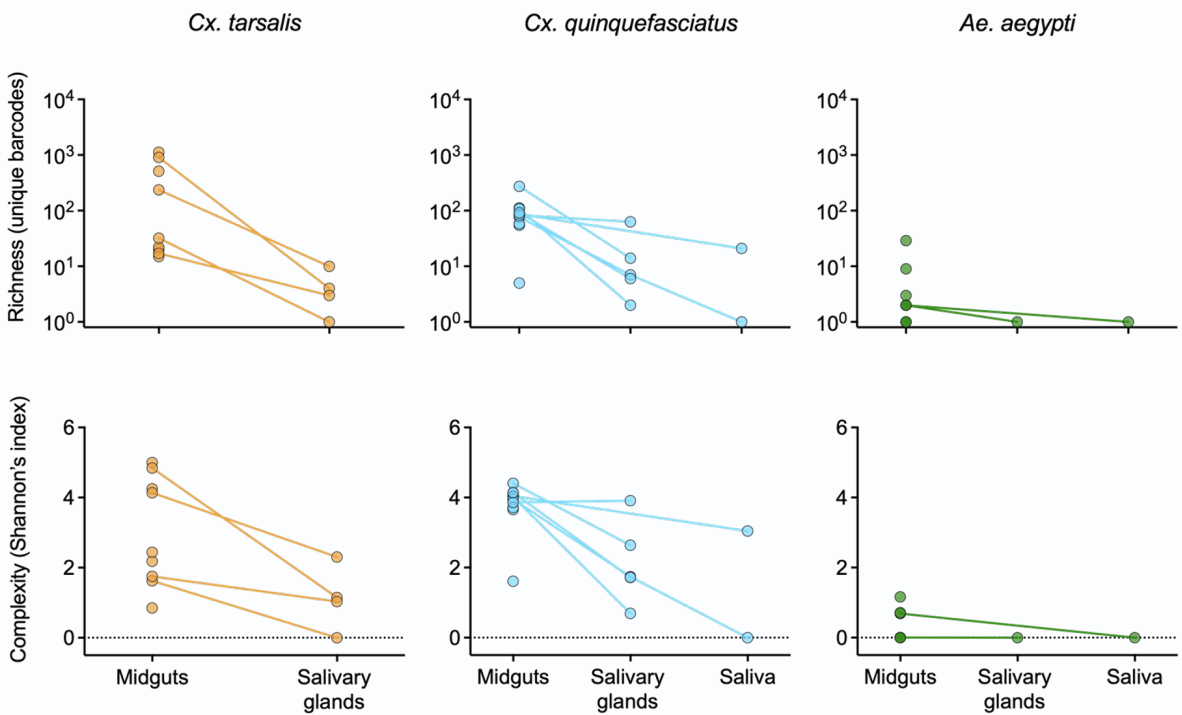

**Supplemental Figure 1. Impact of intrahost bottlenecks on bcWNV populations in *Cx. tarsalis*, *Cx. quinquefasciatus*, and *Ae. aegypti* at days 4 and 12 post infection, related to Figure 3.**

bcWNV population richness and complexity in midgut, salivary gland, and saliva samples from *Cx. tarsalis*, *Cx. quinquefasciatus*, and *Ae. aegypti* mosquitoes at days 4 (**A**) and 12 (**B**) post-infection. Lines connecting points indicate that samples were collected from the same mosquito. Diversity indices were generated by applying the Shannon function from the QSutils package in R to barcode abundance vectors. Dashed line represents 0. Statistical significance determined using Kruskal-Wallis with Dunn's multiple comparisons test, \* =  $p < 0.05$ , \*\* =  $p < 0.005$ , \*\*\* =  $p < 0.0005$ , \*\*\*\* =  $p < 0.0001$ . Only significant comparisons shown.

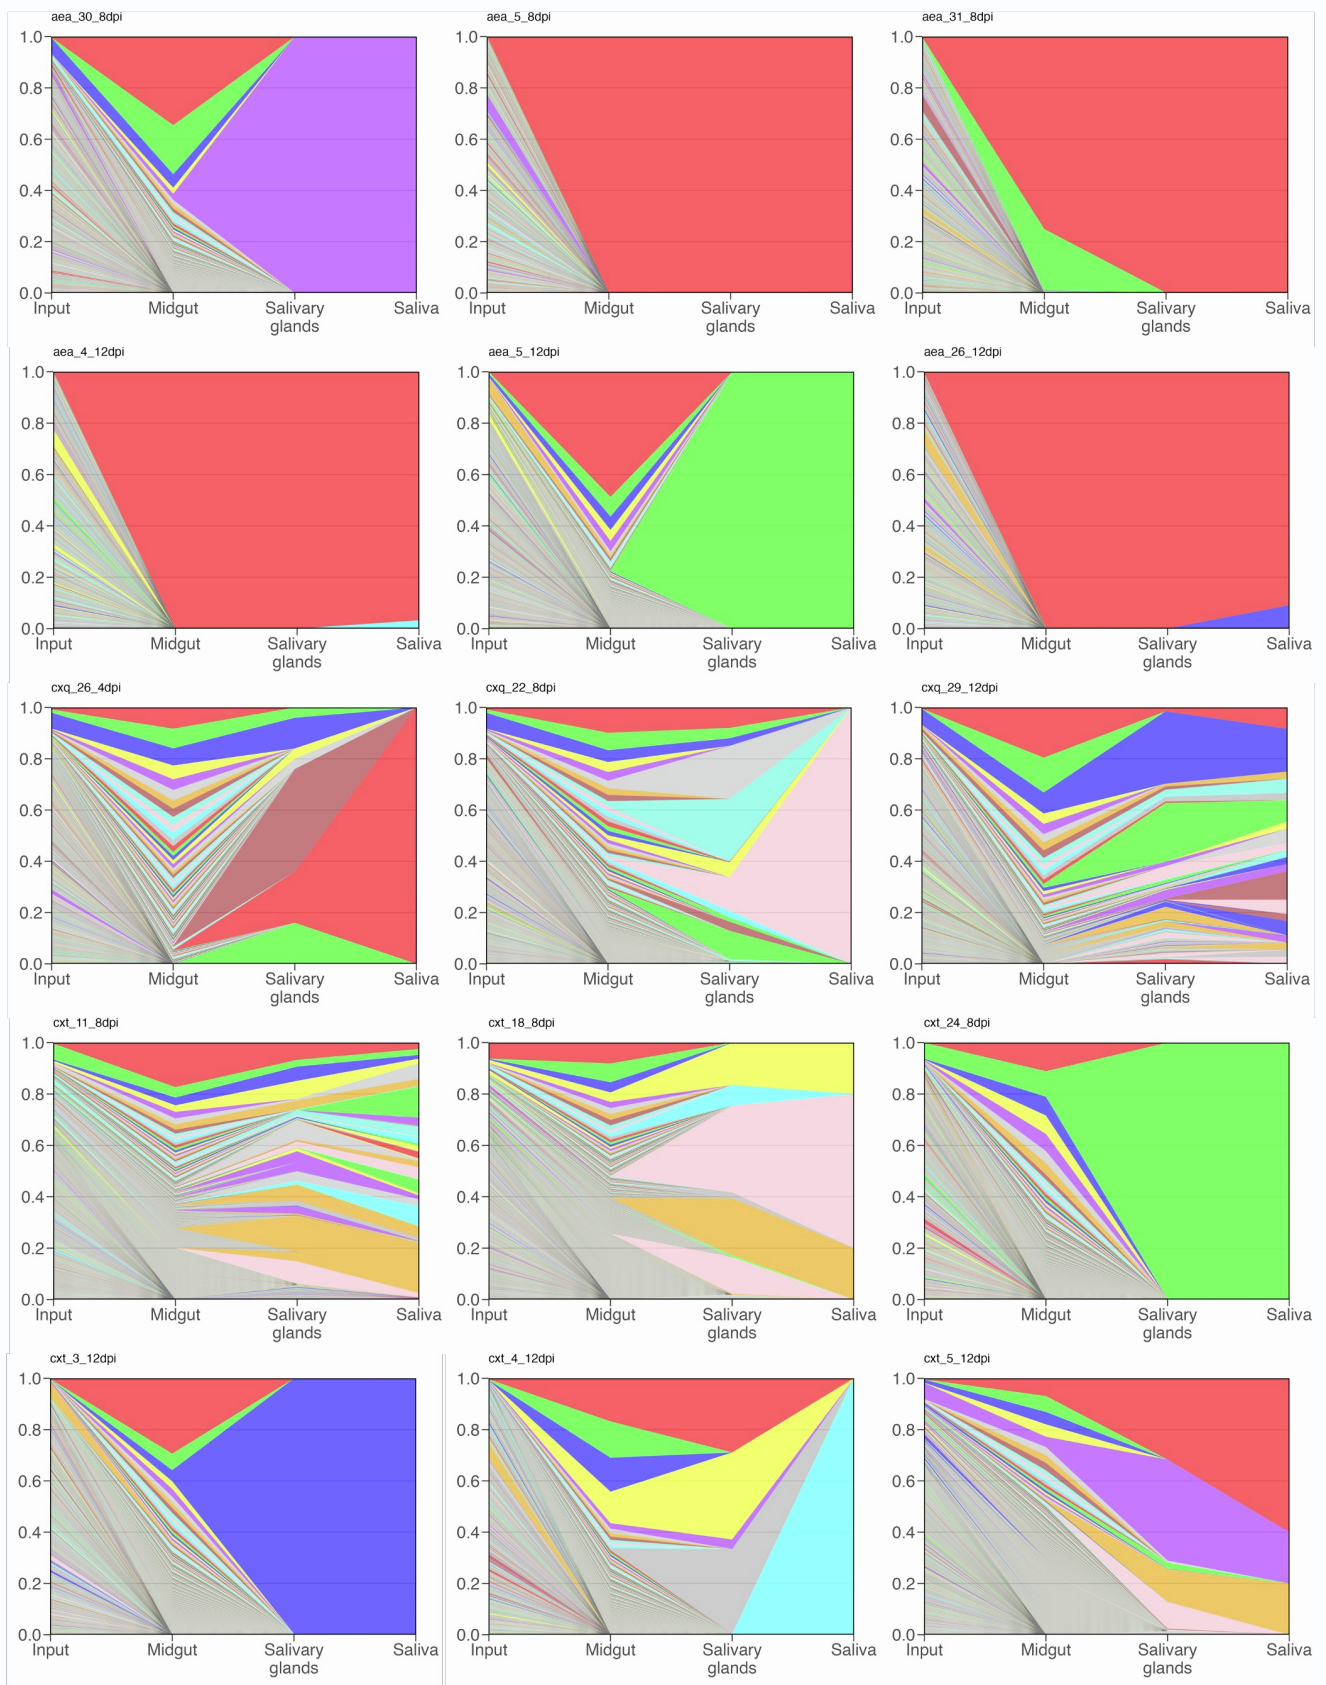

**Supplemental Figure 2. Visualization of bcWNV dynamics in individual mosquitoes not selected for Figure 4A.**

bcWNV barcode dynamics during mosquito infection in individual *Cx. tarsalis*, *Cx. quinquefasciatus*, and *Ae. aegypti* mosquitoes at days 4, 8 and 12 post-infection. Species and timepoint are indicated in plot header; aea = *Ae. aegypti*, cxq = *Cx. quinquefasciatus*, cxt = *Cx. tarsalis*. Barcodes were ranked from most to least frequent by each midgut sample. Color represents barcode rank and is not consistent across graphs.

RNA molecule is labelled with a unique molecular identifier (UMI) during cDNA synthesis:

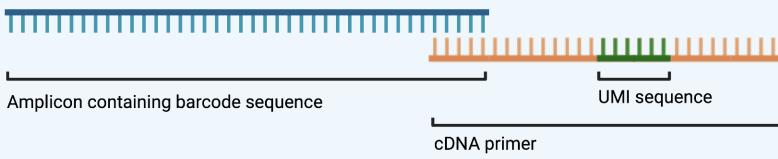

UMIs are used to generate consensus sequences for RNA molecules - accounting for errors introduced during PCR or sequencing, and amplification bias, when calculating barcode abundance:

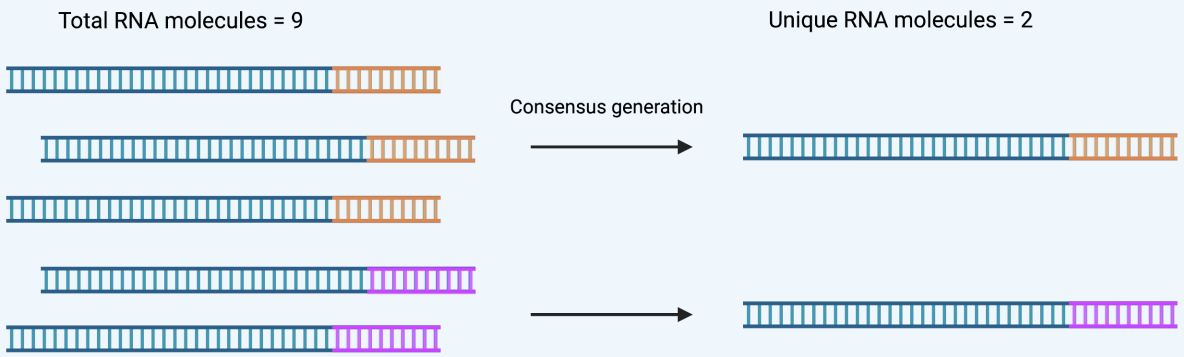

**Supplemental Figure 3. Inclusion of a unique molecular identifier accounts for amplification bias and sequencing error, related to Methods (created with BioRender.com).**

**Supplemental Table 1. Infection rates of relevant compartments in *Cx. tarsalis*, *Cx. quinquefasciatus*, and *Ae. aegypti*, related to Figure 3B.**

| Species:                    | DPI:  | Rate of infection in tissue/secretion: |                 |                |
|-----------------------------|-------|----------------------------------------|-----------------|----------------|
|                             |       | Midguts                                | Salivary Glands | Saliva         |
| <i>Cx. tarsalis</i>         | 4     | 29/36 (80.5%)                          | 27/36 (75.0%)   | 2/36 (5.5%)    |
|                             | 8     | 34/36 (94.4%)                          | 34/36 (94.4%)   | 14/36 (38.9%)  |
|                             | 12    | 35/36 (97.2%)                          | 35/36 (97.2%)   | 35/36 (97.2%)  |
|                             | Total | 98/108 (90.7%)                         | 96/108 (88.9%)  | 51/108 (47.2%) |
| <i>Cx. quinquefasciatus</i> | 4     | 36/36 (100%)                           | 20/36 (55.6%)   | 5/36 (13.9%)   |
|                             | 8     | 36/36 (100%)                           | 15/36 (41.7%)   | 3/36 (8.3%)    |
|                             | 12    | 36/36 (100%)                           | 24/36 (66.7%)   | 9/36 (25.0%)   |
|                             | Total | 108/108 (100%)                         | 59/108 (54.6%)  | 17/108 (15.7%) |
| <i>Ae. aegypti</i>          | 4     | 10/40 (25.0%)                          | 2/40 (5.0%)     | 2/40 (5.0%)    |
|                             | 8     | 24/39 (61.5%)                          | 22/39 (56.4%)   | 10/39 (25.6%)  |
|                             | 12    | 15/39 (38.5%)                          | 19/39 (48.7%)   | 12/39 (30.8%)  |
|                             | Total | 49/118 (41.5%)                         | 43/118 (36.4%)  | 24/108 (22.2%) |

**Supplemental table 2. Primers and probes used for qRT-PCR and library preparation, related to Methods.**

| Primer:              | Sequence:                                                           |
|----------------------|---------------------------------------------------------------------|
| WNV_ENV_F70          | TCAGCGATCTCTCCACCAAAG                                               |
| WNV_ENV_R70          | GGGTCAGCACGTTTGTTCATTG                                              |
| WNENV-prob           | FAM/TGCCCGACC/ZEN/ATGGGAGAAGCTC/3 ABkFQ/                            |
| ID_cDNAWNV_7374_Rev  | GTCTCGTGGGCTCGGAGATGTGTATAAGAGACAGNNNNNNNNNcagtGCCATCCACTACAGCGTTCT |
| 5'_ID_Primer_Rev     | GTCTCGTGGGCTCGGAGATGTGTAT                                           |
| 5'_ID_WNV_7171_For   | TCGTCGGCAGCGTCAGATGTGTATAAGAGACAGNNNNNTTCCCCTTCGTCGATGTTGG          |
| 2nd round FP (N5XX)  | AATGATACGGCGACCACCGAGATCTACAC[i5]TCGTCGGCAGCGTC                     |
| 2nd round RP (N7XXX) | CAAGCAGAAGACGGCATACGAGAT[i7]GTCTCGTGGGCTCGG                         |

\*Nextera sequencing primer binding sites
